## Volume 18, 2007 Supplement 9

Educational and Abstract Book of the ESMO Conference Lugano (ECLU)

5 – 8 July, 2007: Lugano, Switzerland

|                                                                     |       |                                                                                                                                          |       |
|---------------------------------------------------------------------|-------|------------------------------------------------------------------------------------------------------------------------------------------|-------|
| The European Society for Medical Oncology (ESMO)                    | ix1   | <b>hot topics in lung cancer</b>                                                                                                         |       |
| ESMO – Committees                                                   | ix2   | Molecular targeted agents in lung cancer                                                                                                 | ix135 |
| ESMO Educational Structure                                          | ix5   | Adjuvant chemotherapy                                                                                                                    | ix143 |
| ESMO Fellowship Program                                             | ix9   | Adenocarcinoma: a molecular perspective                                                                                                  | ix147 |
| ESMO Young Oncologists                                              | ix11  | Optimal management of locally advanced disease                                                                                           | ix150 |
| ESMO Membership Services                                            | ix12  |                                                                                                                                          |       |
| ESMO Foundation                                                     | ix13  |                                                                                                                                          |       |
| Acknowledgements                                                    | ix14  | <b>abstracts section</b>                                                                                                                 |       |
| ECLU 2007 Officers and Organization                                 | ix16  | ESO symposium: new drug development                                                                                                      | ix157 |
| Introduction from ECLU Working Group Chair,<br>Dr. Andrés Cervantes | ix17  | Basic science and bench to bedside (lab)                                                                                                 | ix159 |
|                                                                     |       | Breast cancer                                                                                                                            | ix161 |
|                                                                     |       | Breast cancer, advanced                                                                                                                  | ix163 |
|                                                                     |       | Breast cancer, early                                                                                                                     | ix165 |
|                                                                     |       | Colorectal cancer                                                                                                                        | ix168 |
|                                                                     |       | Genitourinary tumors                                                                                                                     | ix173 |
|                                                                     |       | Gynecological cancer                                                                                                                     | ix175 |
|                                                                     |       | Head and neck cancer                                                                                                                     | ix176 |
|                                                                     |       | Hematological malignancies                                                                                                               | ix178 |
|                                                                     |       | Lung cancer                                                                                                                              | ix183 |
|                                                                     |       | Melanoma and sarcoma                                                                                                                     | ix186 |
|                                                                     |       | Molecular mechanism implemented in clinical practice                                                                                     | ix187 |
|                                                                     |       | Neuroendocrine tumors and CUP                                                                                                            | ix188 |
|                                                                     |       | Neuro-oncology                                                                                                                           | ix190 |
|                                                                     |       | Prevention and screening                                                                                                                 | ix191 |
|                                                                     |       | Psycho-oncology                                                                                                                          | ix193 |
|                                                                     |       | Supportive care                                                                                                                          | ix194 |
|                                                                     |       | Supportive and palliative care                                                                                                           | ix195 |
|                                                                     |       | Upper gastrointestinal tumors                                                                                                            | ix198 |
|                                                                     |       | Abstracts suffixed                                                                                                                       |       |
|                                                                     |       | “IN” after the abstract’s number are<br>invited abstracts                                                                                |       |
|                                                                     |       | “PD” after the abstract’s number are poster<br>discussions                                                                               |       |
|                                                                     |       | “P” after the abstract’s number are<br>osters                                                                                            |       |
|                                                                     |       | Abstracts without any suffix will not be presented<br>at the conference, but are published in the Educational<br>and Abstract Book only. |       |
|                                                                     |       | Index of subjects                                                                                                                        | ix201 |
|                                                                     |       | Index of authors                                                                                                                         | ix203 |
|                                                                     |       | ECLU 2007 disclosures                                                                                                                    | ix207 |
| <b>meet the professor sessions</b>                                  |       |                                                                                                                                          |       |
| Pharmacodynamic endpoints in primary breast cancer                  | ix21  |                                                                                                                                          |       |
| Pharmacogenomics                                                    | ix24  |                                                                                                                                          |       |
| Response evaluation: beyond RECIST                                  | ix29  |                                                                                                                                          |       |
| Histopathological classification versus molecular<br>classification | ix33  |                                                                                                                                          |       |
| New pain control treatments                                         | ix37  |                                                                                                                                          |       |
| New antiemetic treatments                                           | ix43  |                                                                                                                                          |       |
| <b>educational sessions</b>                                         |       |                                                                                                                                          |       |
| <b>advances in the treatment of hematological<br/>malignancies</b>  |       |                                                                                                                                          |       |
| The clinical use of antibodies in hematological malignancies        | ix51  |                                                                                                                                          |       |
| Optimal sequence of CML treatment                                   | ix58  |                                                                                                                                          |       |
| Optimal treatment of multiple myeloma                               | ix64  |                                                                                                                                          |       |
| Optimal treatment of Hodgkin’s disease                              | ix71  |                                                                                                                                          |       |
| <b>new challenges in kidney cancer therapy</b>                      |       |                                                                                                                                          |       |
| Sunitinib                                                           | ix83  |                                                                                                                                          |       |
| Temsirolimus                                                        | ix87  |                                                                                                                                          |       |
| Bevacizumab                                                         | ix89  |                                                                                                                                          |       |
| Sorafenib                                                           | ix90  |                                                                                                                                          |       |
| Is immunotherapy still alive?                                       | ix94  |                                                                                                                                          |       |
| The optimal sequence of treatments                                  | ix98  |                                                                                                                                          |       |
| <b>multidisciplinary treatment of rectal cancer</b>                 |       |                                                                                                                                          |       |
| Radiotherapy                                                        | ix105 |                                                                                                                                          |       |
| Medical oncology                                                    | ix114 |                                                                                                                                          |       |
| Pathology                                                           | ix122 |                                                                                                                                          |       |
| Integrative decisions in rectal cancer                              | ix127 |                                                                                                                                          |       |
